# Supplementary material for: One-step spontaneous synthesis of fluorescent carbon nanoparticles with thermosensitivity from polyethylene glycol
Source: Royal Society of Chemistry journal article supplement (doi:10.1039/c5nj01129a), 2015-01-01

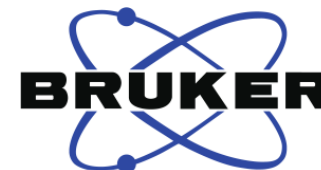

Current Data Parameters  
NAME wenke0624  
EXPNO 1  
PROCNO 1

F2 - Acquisition Parameters  
Date\_ 20150624  
Time 16.03  
INSTRUM spect  
PROBHD 5 mm PABBO BB/  
PULPROG zg30  
TD 65536  
SOLVENT D2O  
NS 64  
DS 4  
SWH 64102.563 Hz  
FIDRES 0.978127 Hz  
AQ 0.5111808 sec  
RG 185.49  
DW 7.800 usec  
DE 6.50 usec  
TE 297.6 K  
D1 2.00000000 sec  
TD0 1

==== CHANNEL f1 =====  
SFO1 161.9674942 MHz  
NUC1 31P  
P1 12.00 usec  
PLW1 18.00000000 W

F2 - Processing parameters  
SI 32768  
SF 161.9755930 MHz  
WDW EM  
SSB 0  
LB 1.00 Hz  
GB 0  
PC 1.40

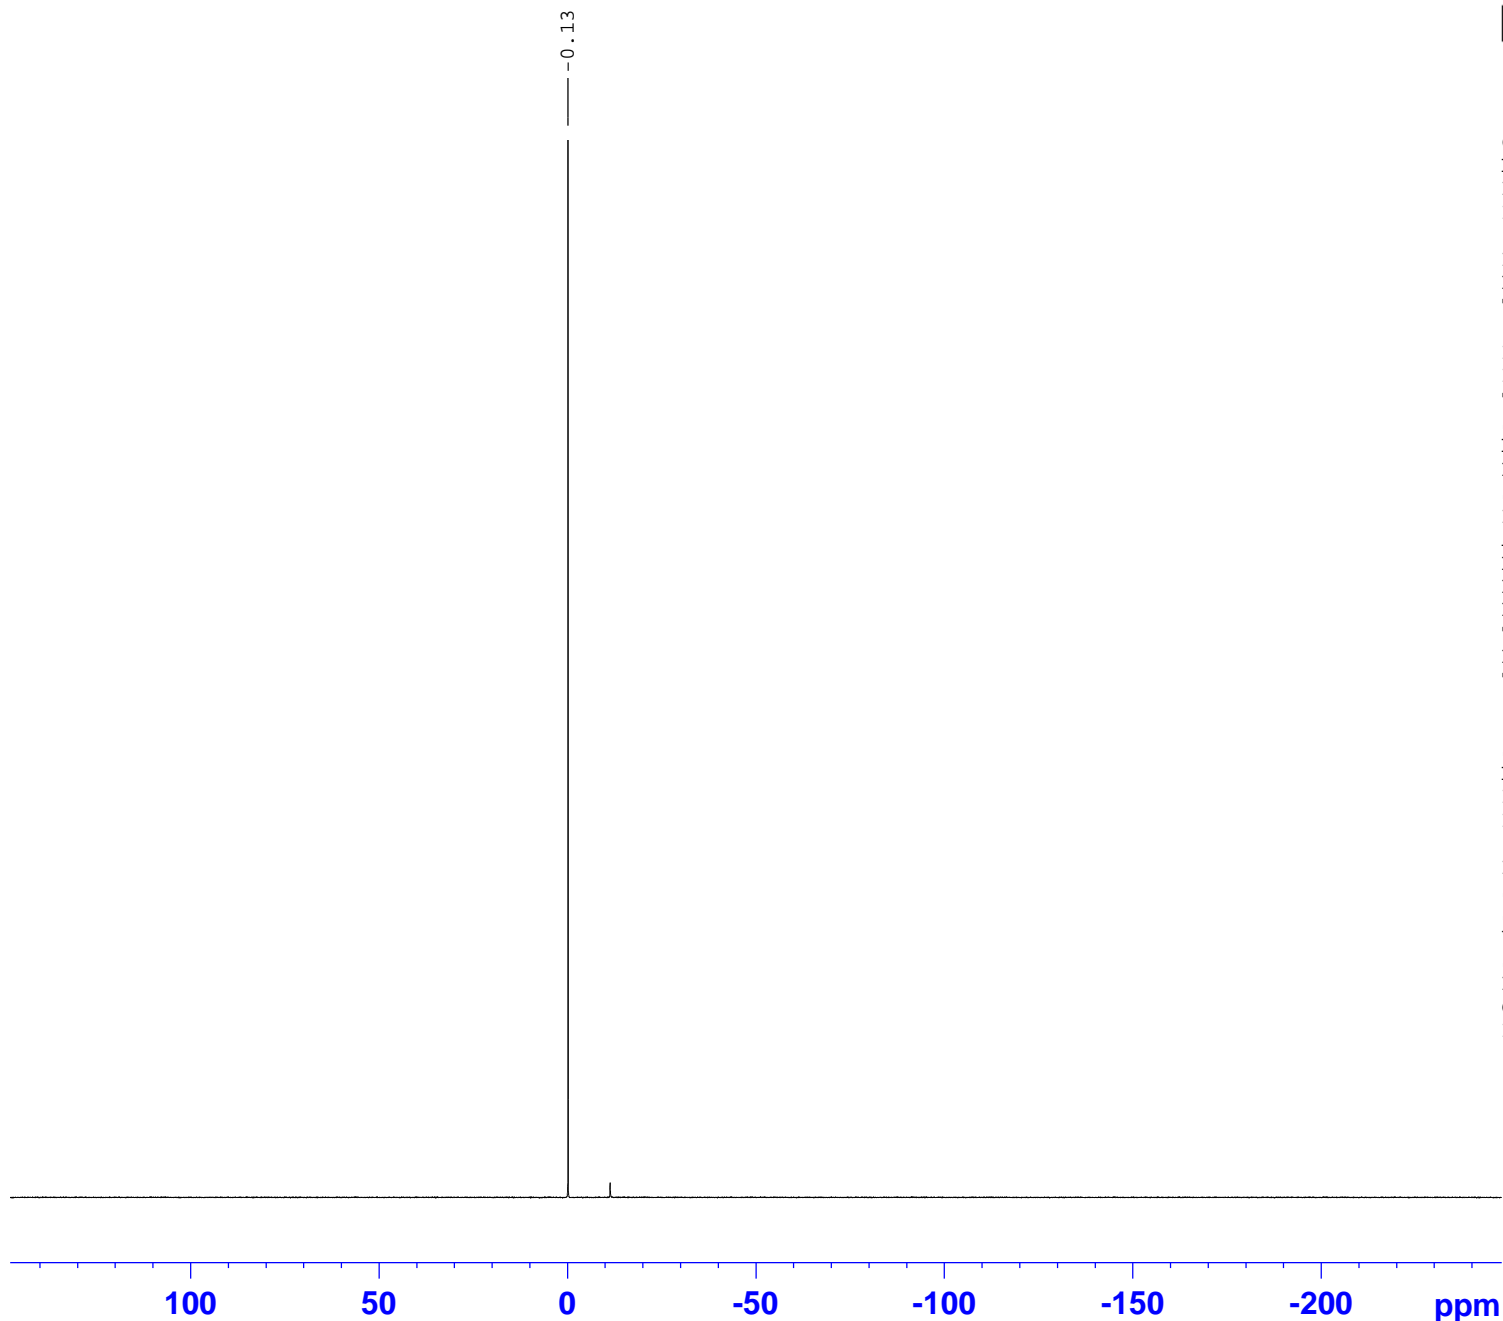

Supplement: c5nj01129a1.pdf [file c5nj01129a1.pdf]
