# Supplementary material for: One-step spontaneous synthesis of fluorescent carbon nanoparticles with thermosensitivity from polyethylene glycol
Source: Royal Society of Chemistry journal article supplement (doi:10.1039/c5nj01129a), 2015-01-01
Supplement: c5nj01129a2.pdf [file c5nj01129a2.pdf]

**Electronic Supplementary Material (ESI) for New Journal of Chemistry.**

**Electronic Supplementary Information**

**One-step spontaneous synthesis of fluorescent  
carbon nanoparticles with thermosensitivity from  
polyethylene glycol†**

Siqiao Li<sup>a</sup>, Renfeng Pan<sup>a</sup>, Yamina Ait Mehdi<sup>a</sup>, Deli Xiao<sup>a, \*</sup>, Hua He<sup>a,b,c \*</sup>

<sup>a</sup> Department of Analytical Chemistry, China Pharmaceutical University, Nanjing 210009, China

<sup>b</sup> Key Laboratory of Drug Quality Control and Pharmacovigilance, Ministry of Education, China Pharmaceutical University, Nanjing 210009, China

<sup>c</sup> Key Laboratory of Biomedical Functional Materials, China Pharmaceutical University, Nanjing 210009, China

\*These authors should be considered co-corresponding authors.

\* To whom correspondence should be addressed: China Pharmaceutical University, 24 Tongjia Lane, Nanjing 210009, Jiangsu Province, China.

Tel.: +86 025 83271505; fax: +86 025 83271505.

E-mail addresses: [dochehua@163.com](mailto:dochehua@163.com), [jcb315@163.com](mailto:jcb315@163.com)

**Table S1.** The quantum yields of FCNPs

| Substance       | Energy supply form                        | Integrated emission intensity ( <i>I</i> ) | Abs. at 360 nm | Refractive index | Quantum yield of solvent ( $\eta$ ) |
|-----------------|-------------------------------------------|--------------------------------------------|----------------|------------------|-------------------------------------|
| Quinine sulfate |                                           | 51329.313                                  | 0.029          | 1.33             | 0.54 (known)                        |
| FCNPs-1         | P <sub>2</sub> O <sub>5</sub> dehydration | 28865.439                                  | 0.048          | 1.33             | 0.184                               |
| FCNPs-2         | Microwave                                 | 28644.789                                  | 0.048          | 1.33             | 0.182                               |
| FCNPs-3         | Hydrothermal                              | 18064.668                                  | 0.037          | 1.33             | 0.149                               |
| FCNPs-4         | Ultrasonic                                | 12165.569                                  | 0.048          | 1.33             | 0.077                               |

**Table S2.** Comparison of fluorescent carbon nanoparticles with different methods

| Method                                    | Source              | Color of products | Excitation and emission wavelength | Composition | Quantum yield | Morphology      | Thermose nsitivity | Reference   |
|-------------------------------------------|---------------------|-------------------|------------------------------------|-------------|---------------|-----------------|--------------------|-------------|
| Microwave                                 | Graphite oxide      | Dark brown        | 470nm, 520nm                       | C,O         | 1-2.5%        | spherical dots  | -                  | [21]        |
| Hydrothermal                              | Folic acid          | Brown-yellow      | 395nm, 470nm                       | C,N,O       | 15.7%         | spherical dots  | -                  | [22]        |
| Ultrasonic                                | Glucose             | Dark brown        | 360nm, 425nm                       | C,O         | 7.0%          | spherical dots  | -                  | [8]         |
| Combustion                                | Soot of natural gas | Brownish yellow   | 310nm, 420nm                       | C,O         | 0.4%          | spherical dots  | -                  | [11]        |
| P <sub>2</sub> O <sub>5</sub> dehydration | PEG-400             | Dark brown        | 360nm, 410nm                       | C,O         | 18.4%         | spherical shape | +                  | this method |

“+” denotes that the nanoparticle has thermosensitivity, “-” denotes the thermosensitivities of other nanomaterials are unknown on account that this property is not investigated in articles.

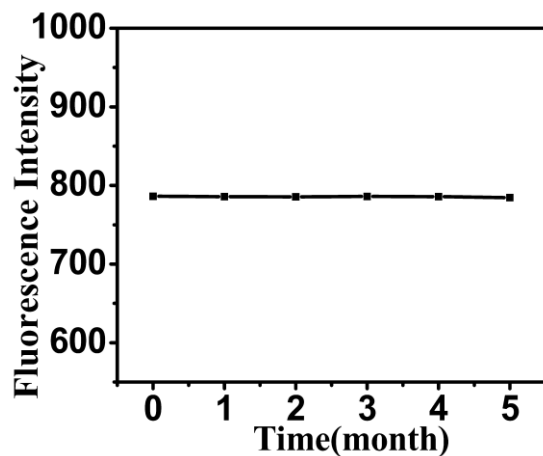

Fig S1. Stability of FCNPs obtained.

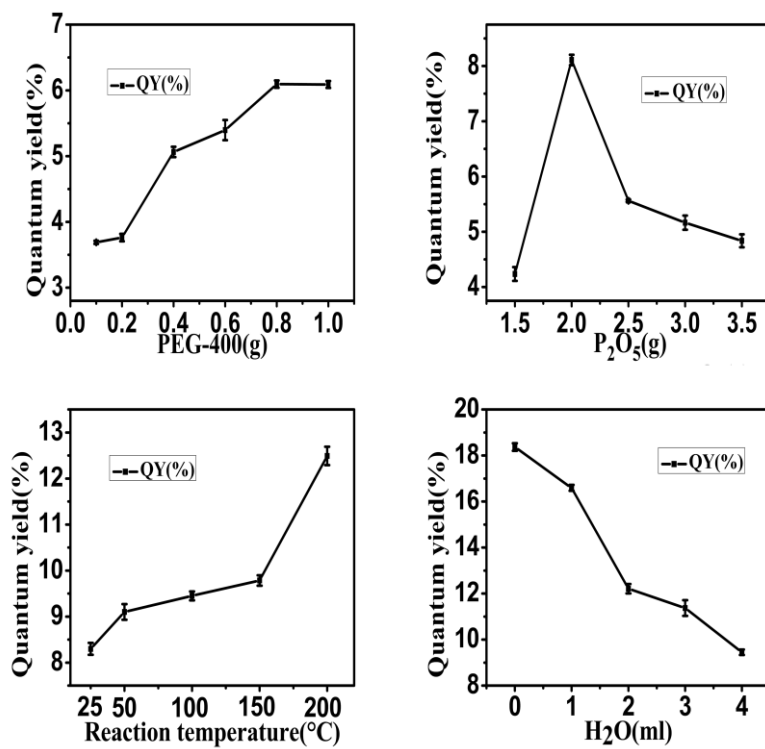

Fig S2. Optimization of experimental conditions (varying amounts of PEG-400,  $P_2O_5$ ,  $H_2O$  and reaction temperature).

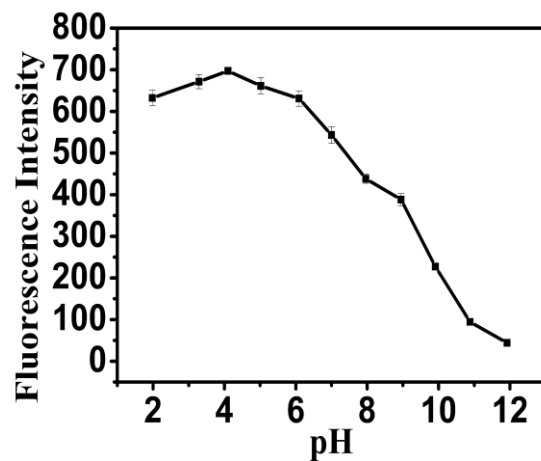

**Fig S3.** The influence of pH (2-12, respectively) on the fluorescence intensity of FCNPs.

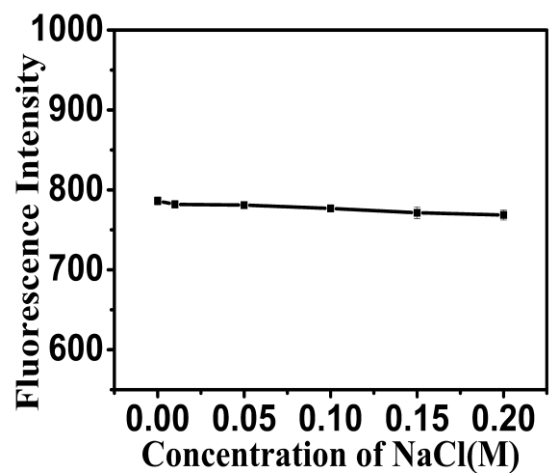

**Fig S4.** The influence of ionic strength (0.01 M, 0.05 M, 0.10 M, 0.15 M, 0.20 M NaCl solution) on the fluorescence intensity of FCNPs.

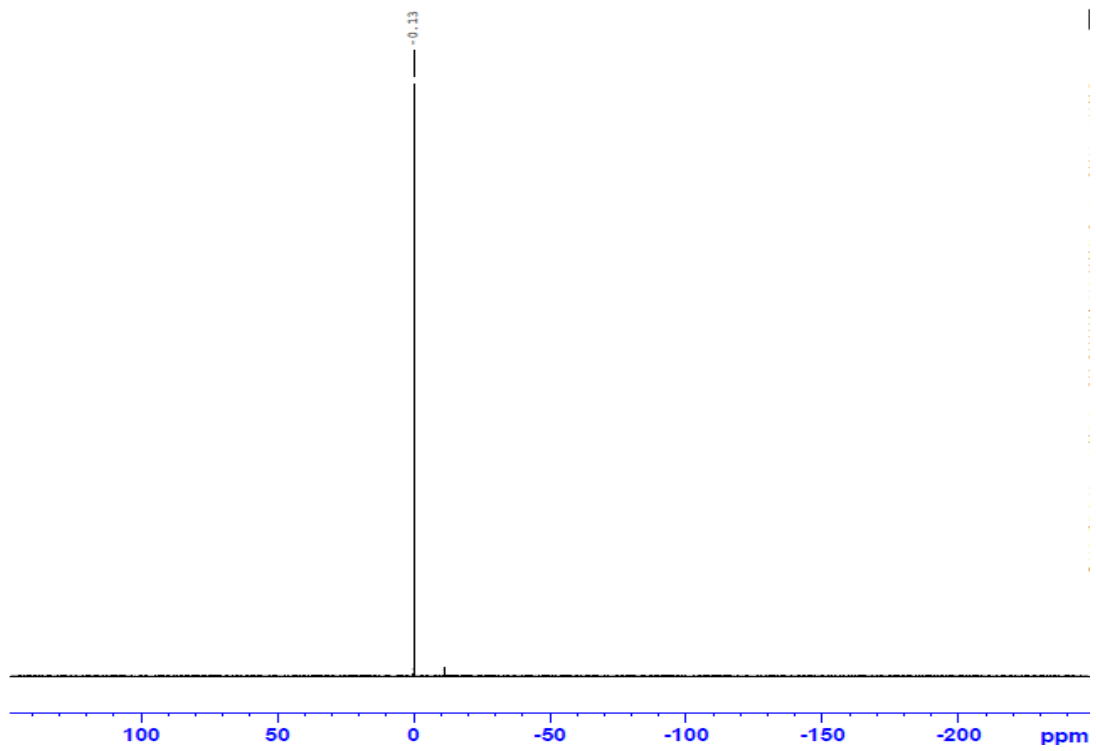

**Fig S5.**  $^{31}\text{P}$  NMR spectrum of FCNPs.
